# Supplementary material for: SFT-4/Surf4 control ER export of soluble cargo proteins and participate in ER exit site organization
Source: PubMed Central journal article supplement — J Cell Biol. 2018 Jun 4;217(6):2073–85. doi: 10.1083/jcb.201708115 (PMC5987718; doi:10.1083/jcb.201708115), 2018-06-04
Supplement: JCB_201708115_sm.pdf [file JCB_201708115_sm.pdf]

Supplemental material

Saegusa et al., <https://doi.org/10.1083/jcb.201708115>

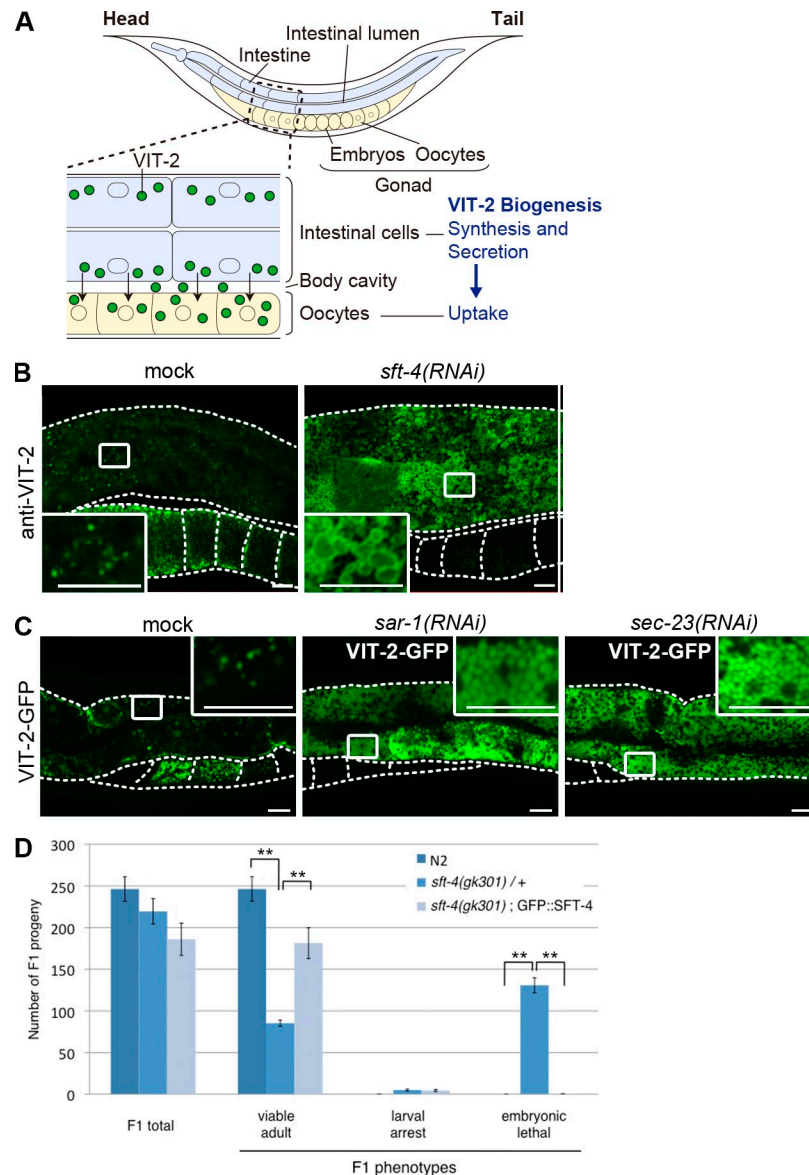

Figure S1. **SFT-4 is essential for yolk secretion and early development.** (A) Schematic presentation of VIT-2 trafficking in the *C. elegans* body. VIT-2 is initially synthesized in intestinal cells as a lipoprotein that contains neutral lipids such as triacylglycerol and cholesterol ester. VIT-2 is secreted from the intestinal cells into the body cavity and then taken up by oocytes through receptor-mediated endocytosis. (B) Immunostaining with an anti-VIT-2 antibody showing accumulation of VIT-2-containing vesicles in *sft-4(RNAi)* intestinal cells. Dotted lines indicate the outlines of intestines and oocytes. Regions surrounded by squares are enlarged (16 $\times$ ) in insets. Bars, 10  $\mu$ m. (C) VIT-2-GFP accumulation was also observed when *sar-1* or *sec-23* was knocked down. L3 larvae were treated with RNAi for 2 d. Dotted lines indicate the outlines of intestines and oocytes. Regions surrounded by squares are enlarged (16 $\times$ ) in insets. Bars, 10  $\mu$ m. (D) *C. elegans sft-4(gk301)* mutant showed severe embryonic lethality. L4 larvae from WT N2 ( $n = 5$ ) or heterozygotes of *sft-4(gk301)* ( $n = 5$ ) were placed on nematode growth medium plates, and the phenotypes of the F1 progeny were scored. The brood size of the *sft-4(gk301)* heterozygotes was comparable to that of N2, whereas their F1 progeny showed embryonic lethal phenotypes (60%), and only 39% of the progeny reached adulthood. GFP-SFT-4 expression under *sft-4* promoter rescued the embryonic lethality of the homozygotes of *sft-4(gk301)*, which indicates that the fusion protein was functional. Results were analyzed using Student's *t* test; \*\*,  $P < 0.05$ ; means  $\pm$  SD.

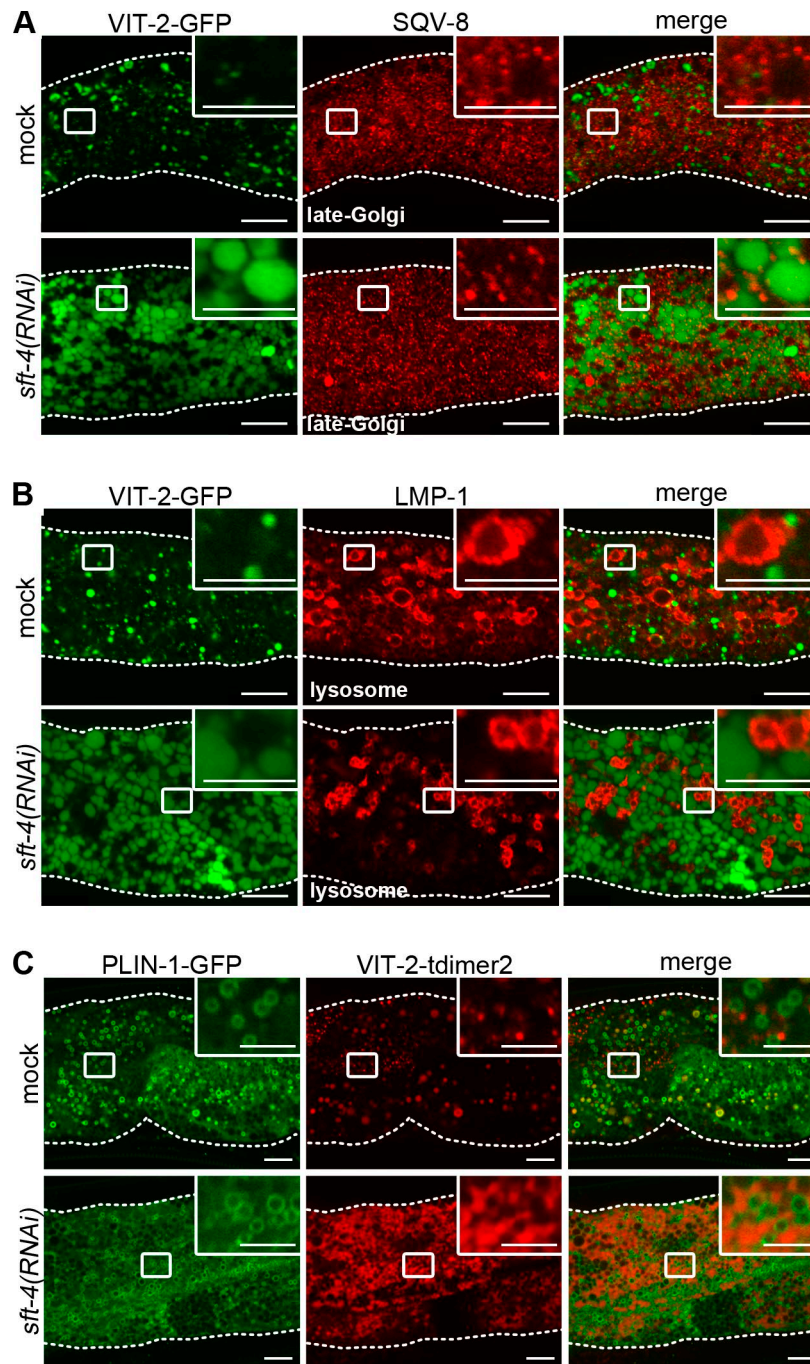

Figure S2. **VIT-2-GFP is not accumulated in late Golgi, lysosomes, and LDs in *sft-4(RNAi)* intestinal cells.** (A and B) Subcellular localization of VIT-2-GFP and SQV-8 (late Golgi; A) or LMP-1 (lysosome; B). Intestinal cells dissected from WT and *sft-4(RNAi)* animals were stained with anti-SQV-8 or anti-LMP-1 antibody. Knockdown of *sft-4* caused severe accumulation of VIT-2-GFP, whereas the localization of SQV-8 and LMP-1 was almost unchanged as compared with that in mock-treated cells. (C) The intestinal cells of transgenic worms coexpressing PLIN-1-GFP and VIT-2-tdimer2 were treated with mock or *sft-4(RNAi)*. Loss of SFT-4 caused VIT-2-tdimer2 accumulation in the ER but did not affect the localization or size of PLIN-1-GFP-positive LDs. Dotted lines indicate the outlines of intestines. Regions surrounded by squares are enlarged (16×) in insets. Bars: 10 μm; (insets) 5 μm.

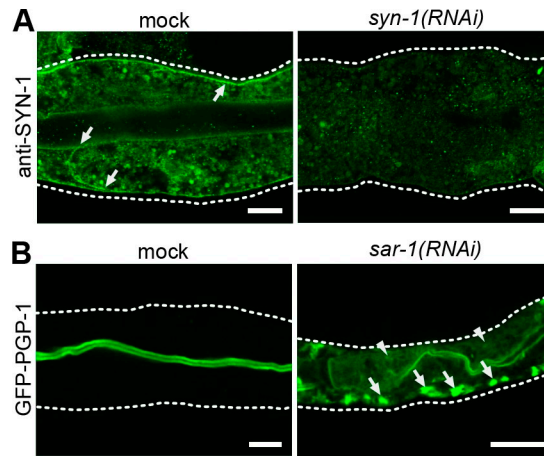

Figure S3. **Loss of SAR-1 affects the transport of plasma membrane protein.** **(A)** An anti-SYN-1 antibody recognizes endogenous SYN-1 proteins. Immunostaining using an anti-SYN-1 antibody mainly labeled the basolateral plasma membrane of intestinal cells in control animals (left; arrows) but not in *syn-1(RNAi)* animals (right). **(B)** SAR-1 is important for transport of GFP-PGP-1 to the apical membrane in intestinal cells. GFP-PGP-1 was mainly localized to apical plasma membrane in control intestinal cells, but it accumulated in reticular ER structures (arrowheads) and large punctate structures (arrows) near the plasma membrane in *sar-1(RNAi)* intestinal cells. Dotted lines indicate the outlines of intestines. Bars, 10  $\mu$ m.

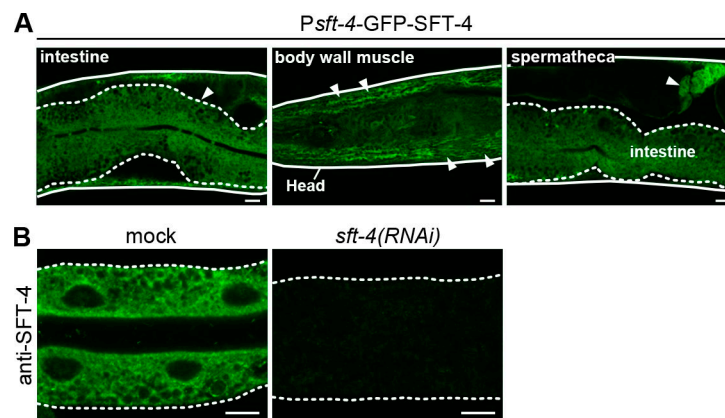

Figure S4. **Tissue-expression pattern of SFT-4.** **(A)** SFT-4 is highly expressed in the intestine, body wall muscle, and spermatheca. GFP-SFT-4 expressed under the control of the *sft-4* promoter (*Psft-4-GFP-SFT-4*) was detected in the intestine (left; arrowhead), body wall muscle (middle; arrowheads), and spermatheca (right; arrowhead). Dotted lines indicate the outlines of intestines, and lines indicate the outlines of the body wall. Bars, 10  $\mu$ m. **(B)** An anti-SFT-4 antibody recognizes endogenous SFT-4 proteins. Immunostaining using an anti-SFT-4 antibody mainly labeled the ER reticular network and punctate structures in intestinal cells in control animals (left) but not in *sft-4(RNAi)* animals (right). Dotted lines indicate the outlines of intestines. Bars, 10  $\mu$ m.
